# Supplementary material for: Flexible bidentate aluminum Lewis acids for host–guest complex formation
Source: Royal Society of Chemistry journal article supplement (doi:10.1039/d4dt03288h), 2025-01-01
Supplement: d4dt03288h1.pdf [file d4dt03288h1.pdf]

## ***Supporting Information***

### **Flexible Bidentate Aluminum Lewis Acids for Host–Guest Complex Formation**

Tz-Ching Tsui,<sup>a</sup> Hao-Yuan Lan,<sup>a</sup> Han-Jung Li,<sup>a</sup> Ting-Shen Kuo,<sup>b</sup> and Hsueh-Ju Liu<sup>\*a,c</sup>

[a] Department of Applied Chemistry, National Yang Ming Chiao Tung University, Hsinchu City 300093, Taiwan

[b] Department of Chemistry, National Taiwan Normal University, Taipei 11677, Taiwan

[c] Center for Emergent Functional Matter Science, National Yang Ming Chiao Tung University, 1001 Daxue Rd, East District, Hsinchu City, Taiwan 300093

Corresponding author's E-mail: [hsuehjuli@nycu.edu.tw](mailto:hsuehjuli@nycu.edu.tw)

#### **Table of content:**

|                                                                                            |           |
|--------------------------------------------------------------------------------------------|-----------|
| <b>1. NMR CHARACTERIZATIONS FOR ALL COMPOUNDS.....</b>                                     | <b>2</b>  |
| <b>2. SINGLE-CRYSTAL X-RAY DIFFRACTION CRYSTAL STRUCTURE FIGURES AND DATA TABLES .....</b> | <b>12</b> |
| <b>3. COMPUTATIONAL DETAILS AND RESULTS .....</b>                                          | <b>25</b> |
| <b>4. REFERENCES .....</b>                                                                 | <b>26</b> |

## 1. NMR characterizations for all compounds

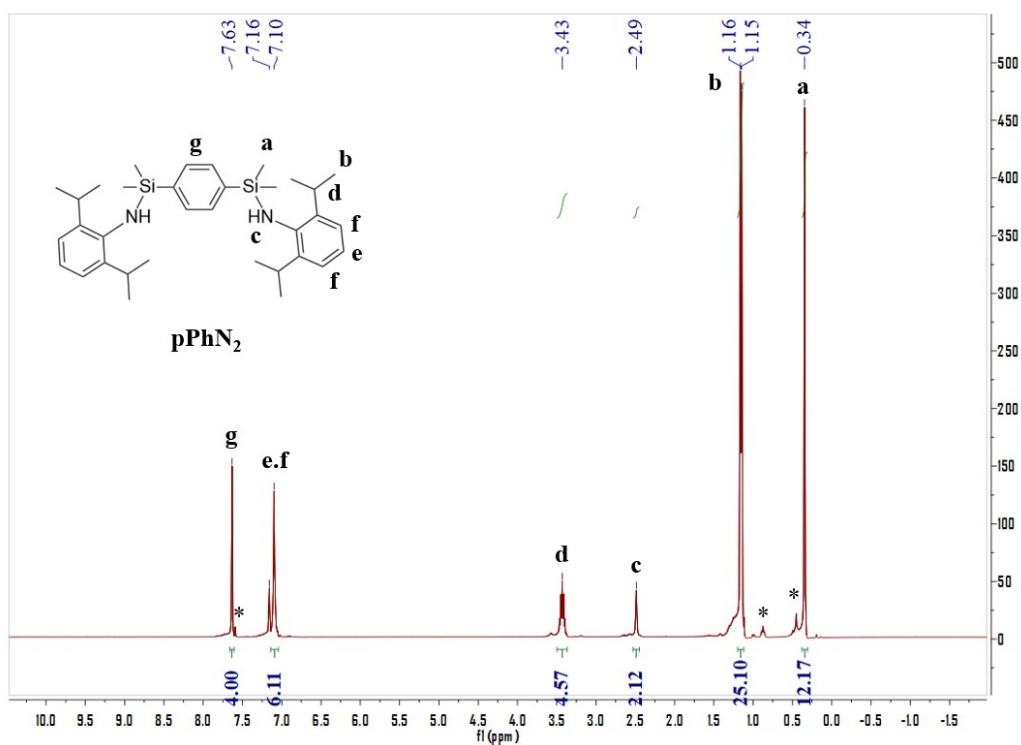

Figure S1.  $^1\text{H}$  NMR spectrum of  $\text{H}_2\text{L1}$  in  $\text{C}_6\text{D}_6$ .

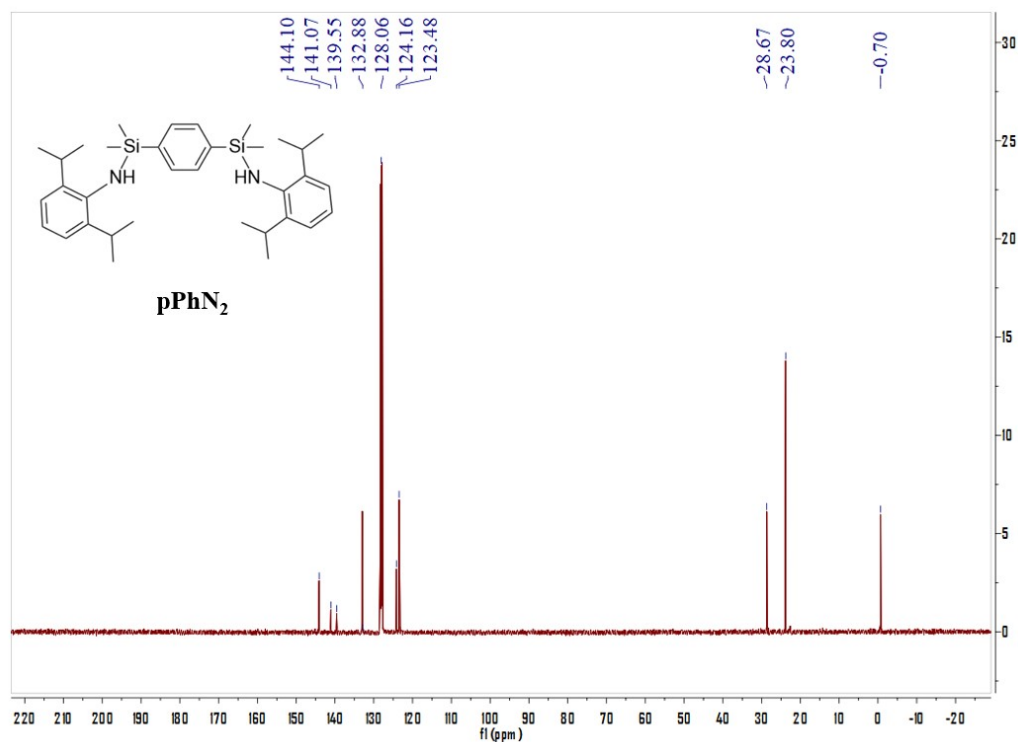

Figure S2.  $^{13}\text{C}\{^1\text{H}\}$  NMR spectrum of  $\text{H}_2\text{L1}$  in  $\text{C}_6\text{D}_6$ .

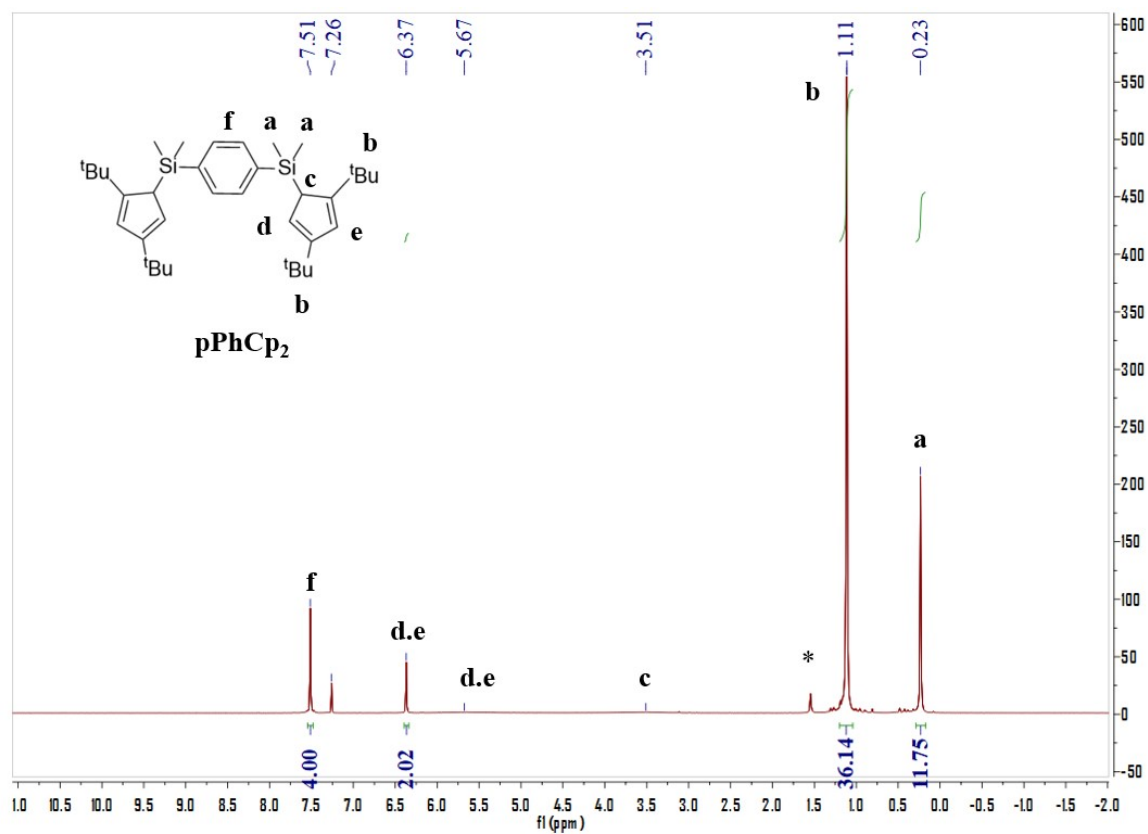

Figure S3.  $^1H$  NMR spectrum of  $H_2L_2$  in  $CDCl_3$ .

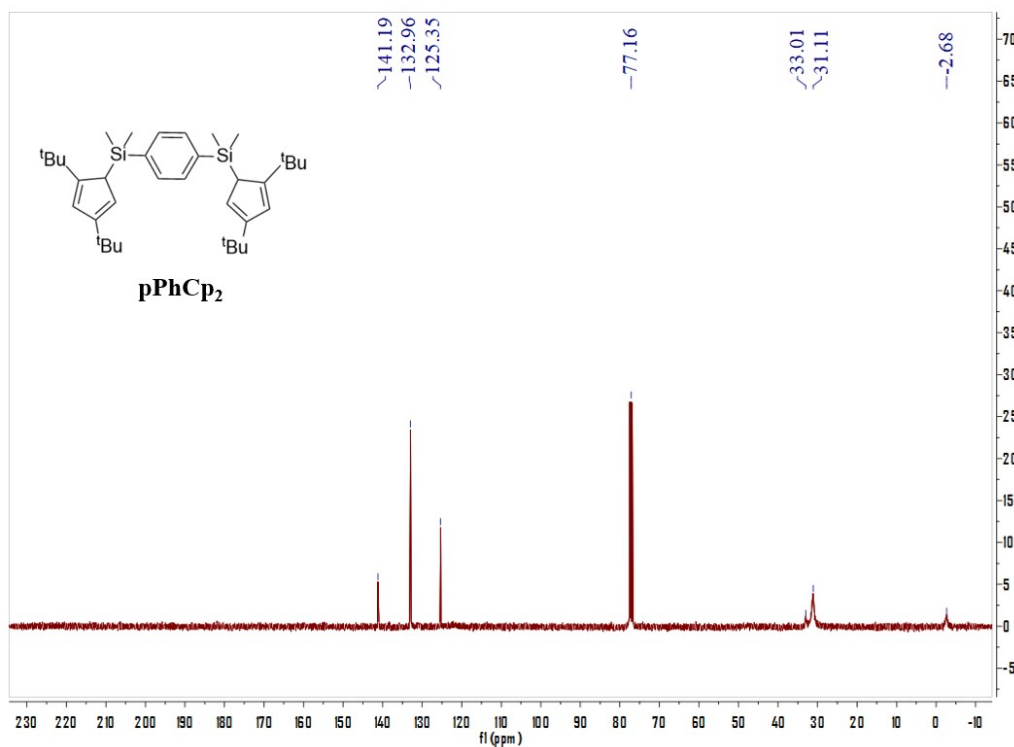

Figure S4.  $^{13}C\{^1H\}$  NMR spectrum of  $H_2L_2$  in  $CDCl_3$ .

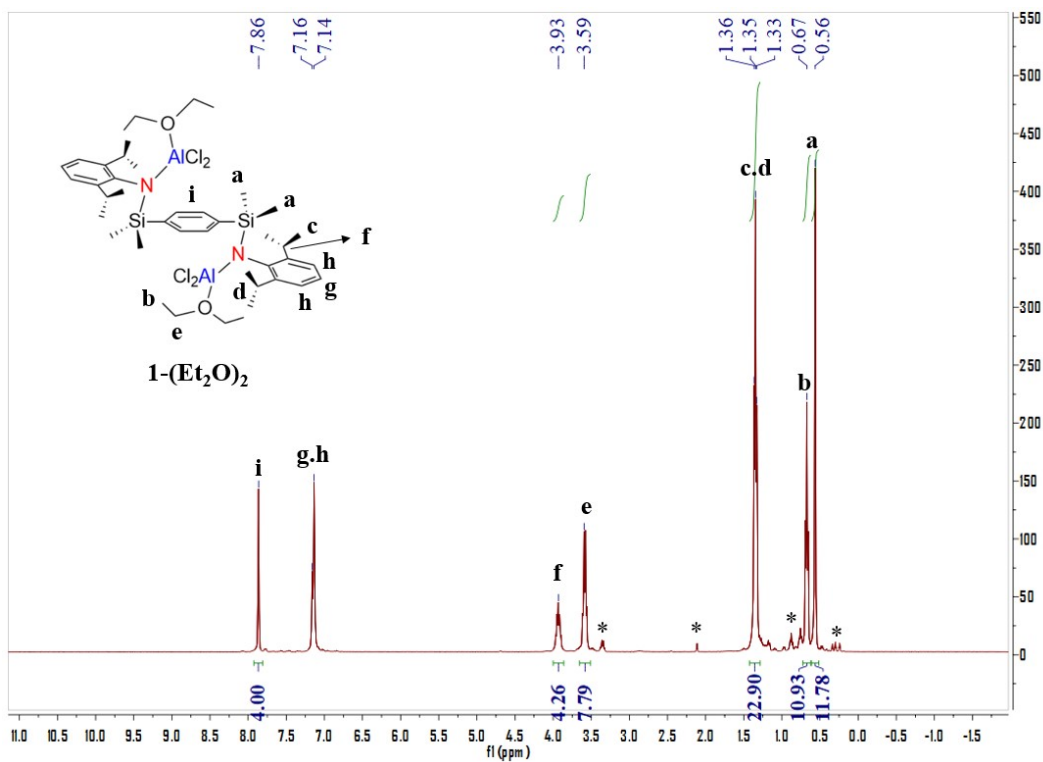

Figure S5.  $^1\text{H}$  NMR spectrum of  $1-(\text{Et}_2\text{O})_2$  in  $\text{C}_6\text{D}_6$ .

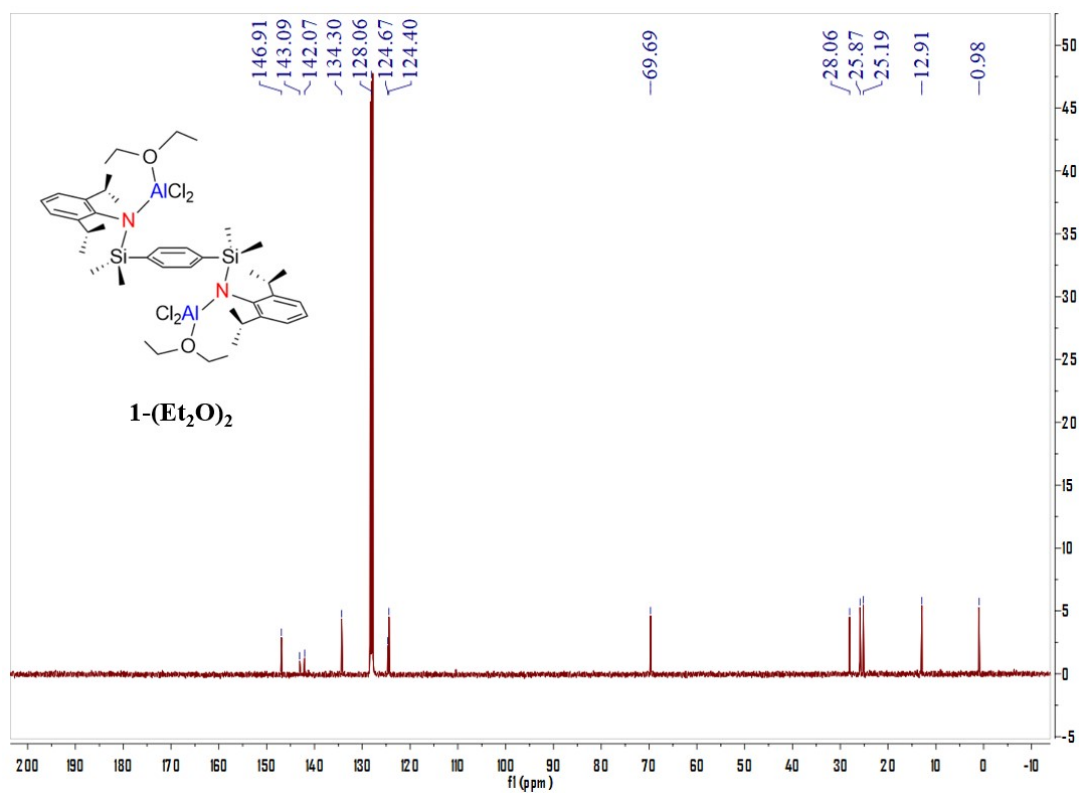

Figure S6.  $^{13}\text{C}\{^1\text{H}\}$  NMR spectrum of  $1-(\text{Et}_2\text{O})_2$  in  $\text{C}_6\text{D}_6$ .

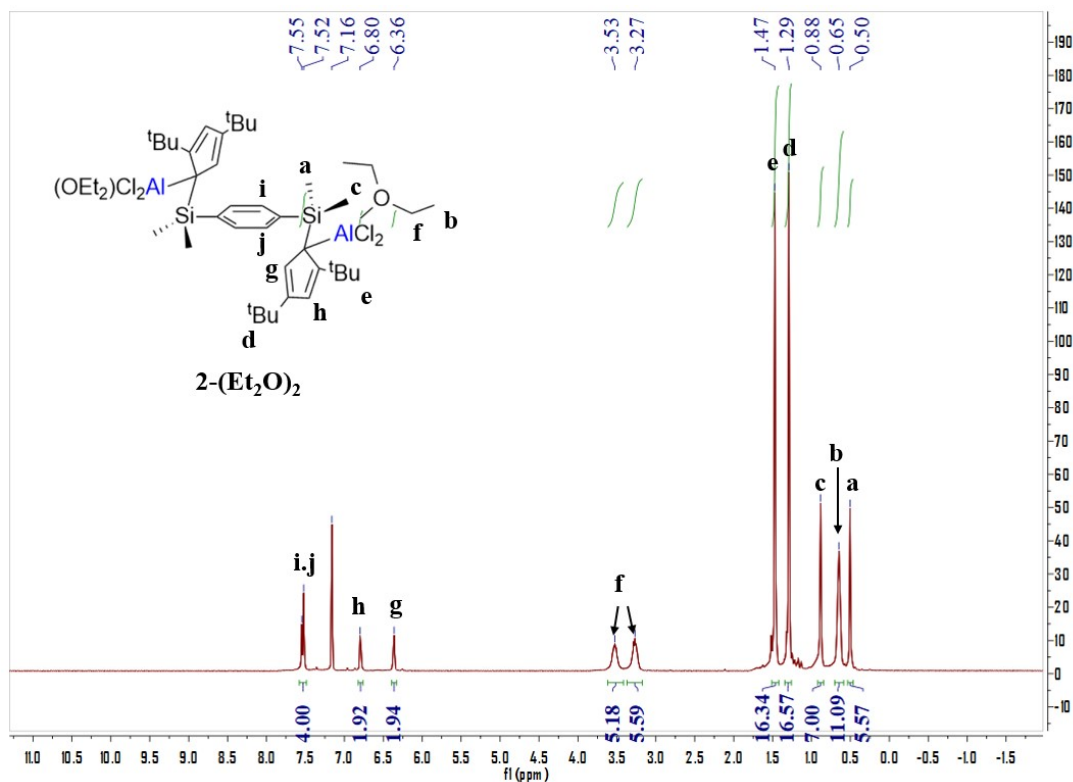

Figure S7.  $^1H$  NMR spectrum of  $2-(Et_2O)_2$  in  $C_6D_6$ .

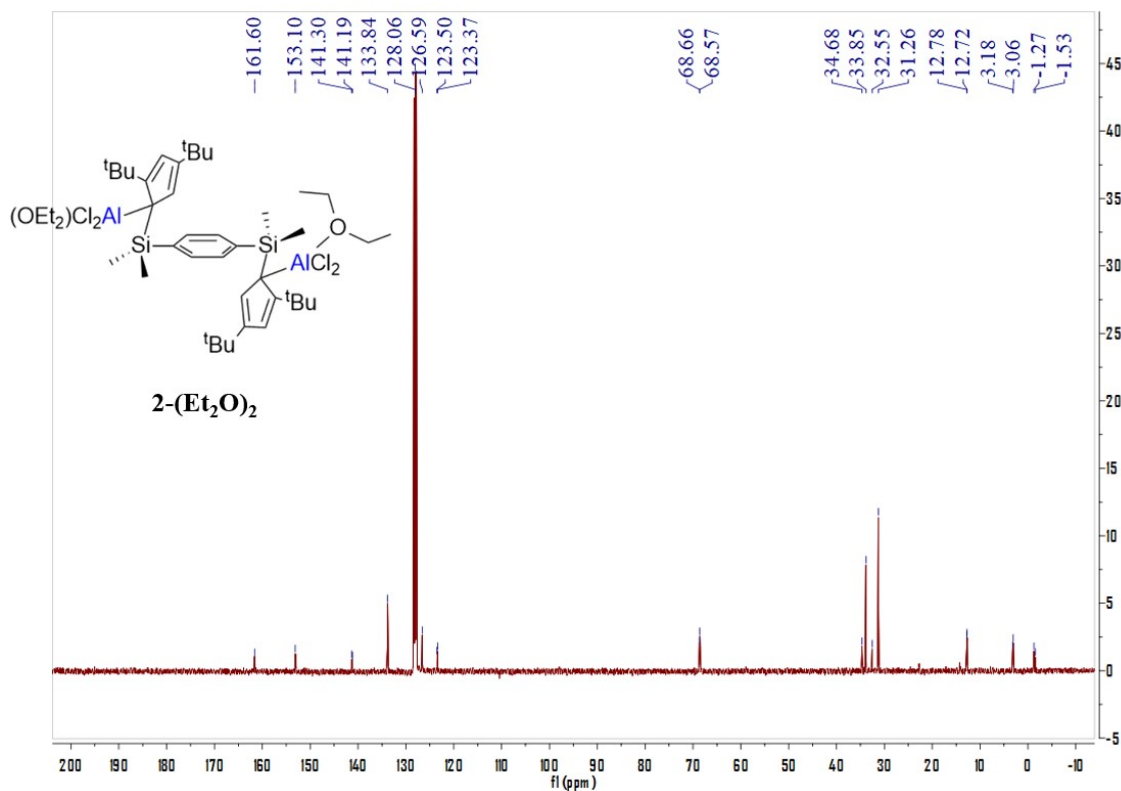

Figure S8.  $^{13}C\{^1H\}$  NMR spectrum of  $2-(Et_2O)_2$  in  $C_6D_6$ .

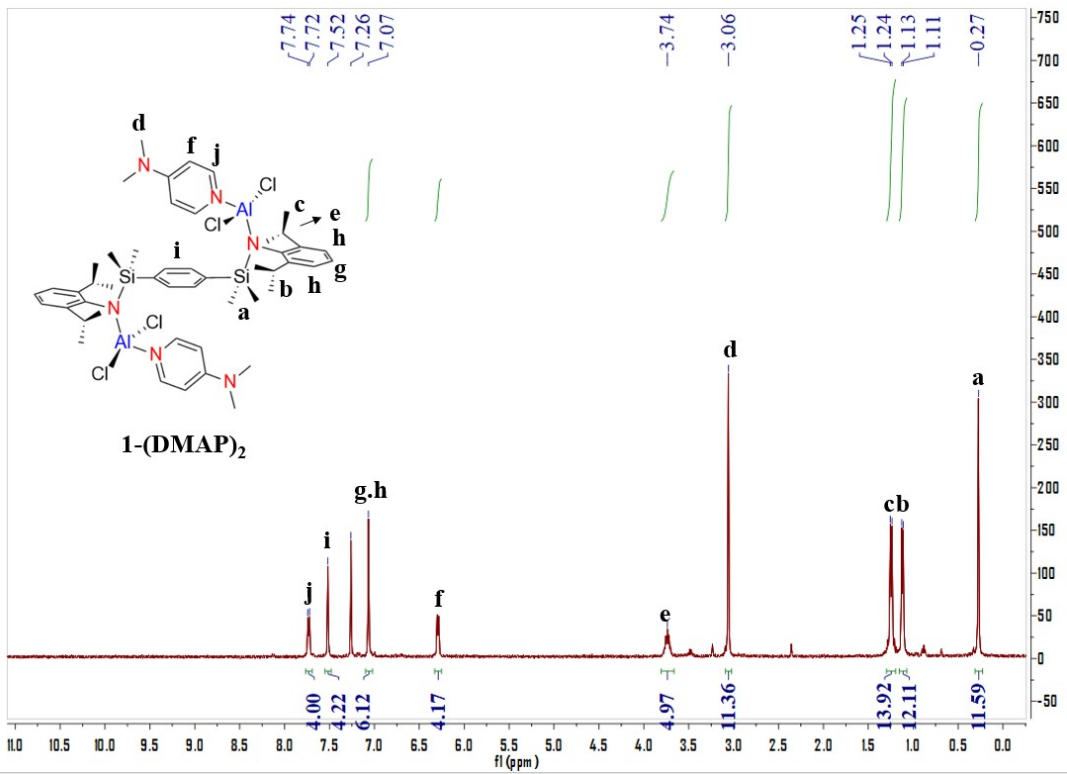

Figure S9.  $^1\text{H}$  NMR spectrum of  $1\text{-(DMAP)}_2$  in  $\text{CDCl}_3$ .

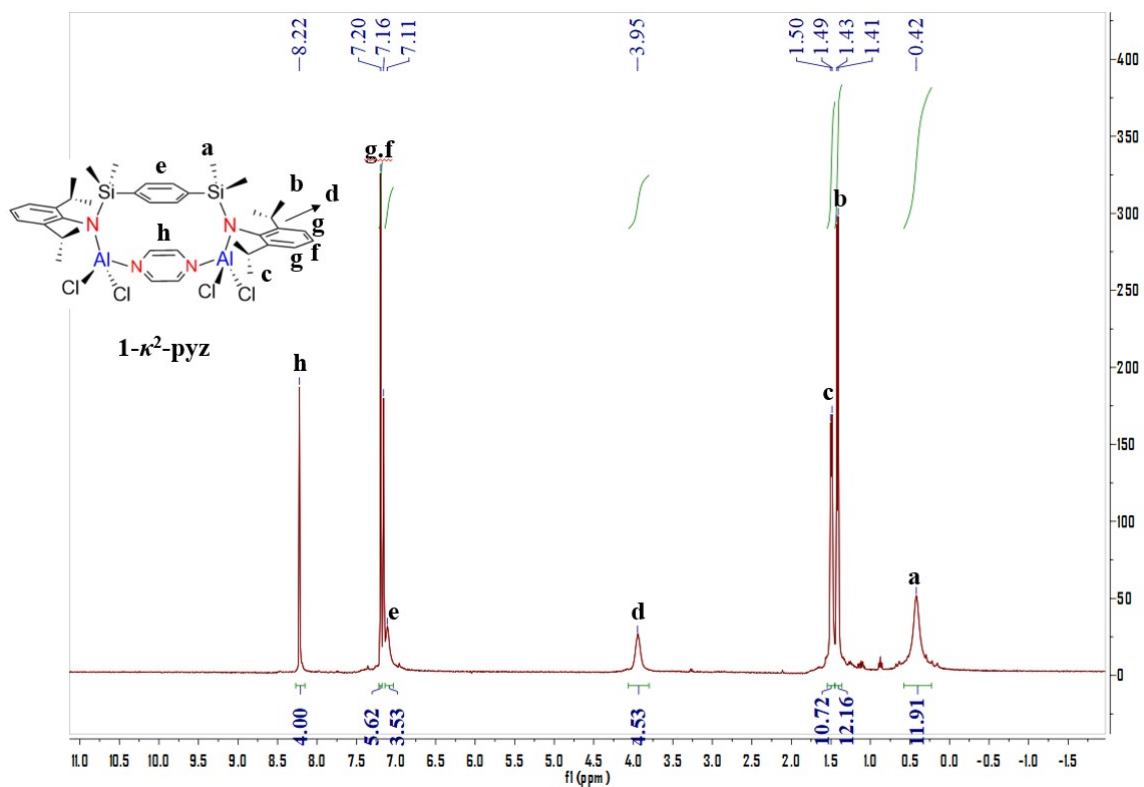

Figure S10.  $^1\text{H}$  NMR spectrum of  $1-\kappa^2\text{-pyz}$  in benzene- $d_6$ .

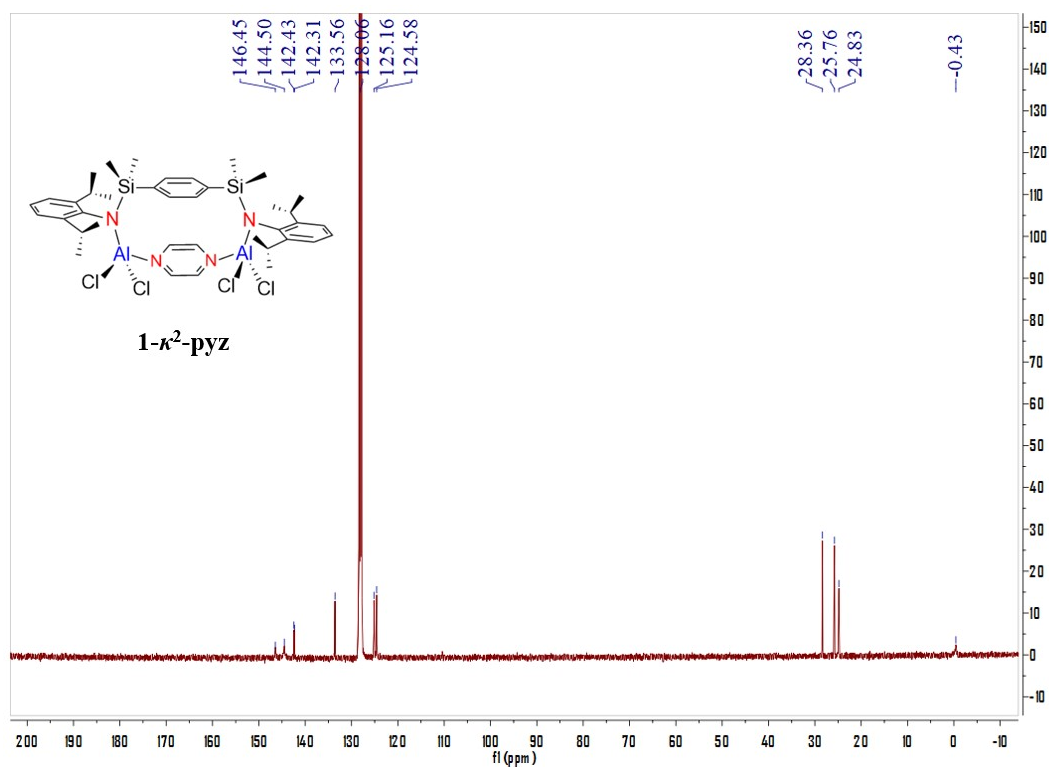

Figure S11.  $^{13}\text{C}\{^1\text{H}\}$  NMR spectrum of  $1-\kappa^2\text{-pyz}$  in benzene- $d_6$ .

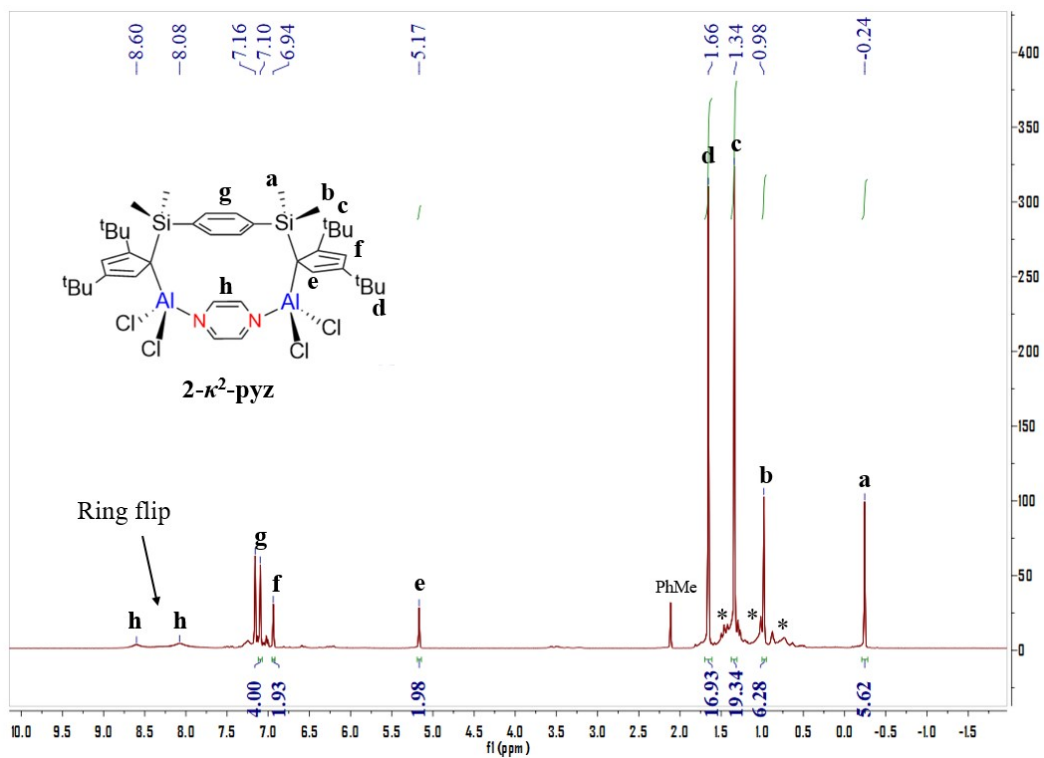

**Figure S12.**  $^1\text{H}$  NMR spectrum of **2- $\kappa^2$ -pyz** in benzene- $d_6$ .



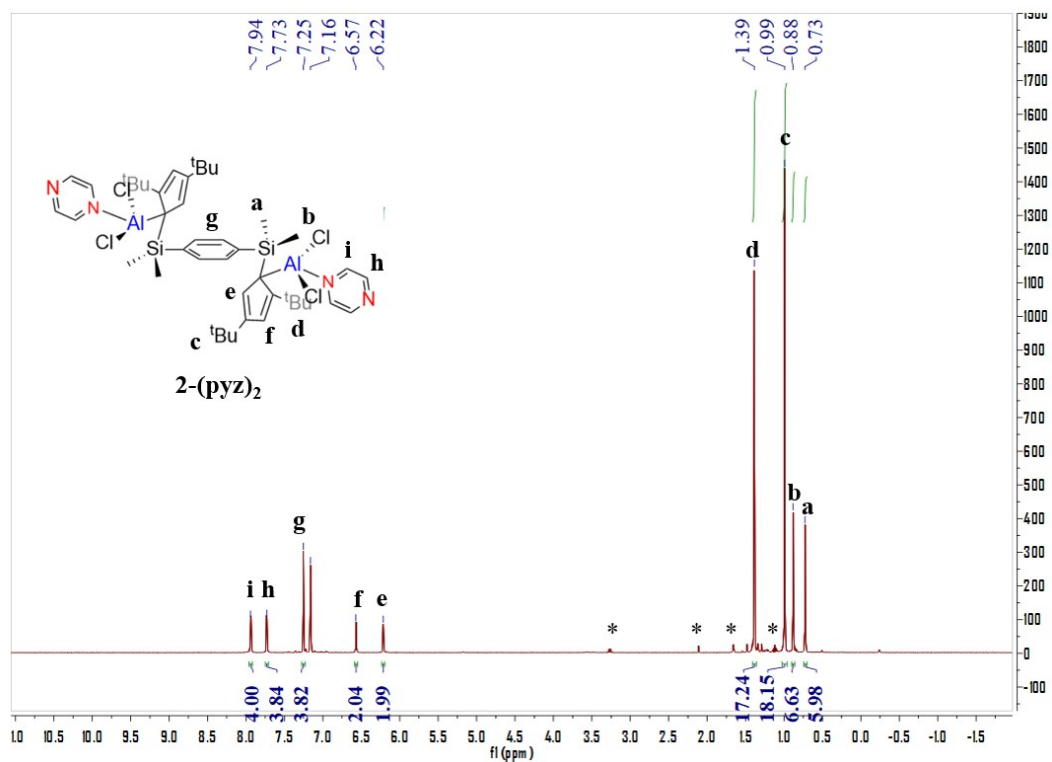

**Figure S13.** <sup>1</sup>H NMR spectrum of **2-(pyz)<sub>2</sub>** in benzene-d<sub>6</sub>.

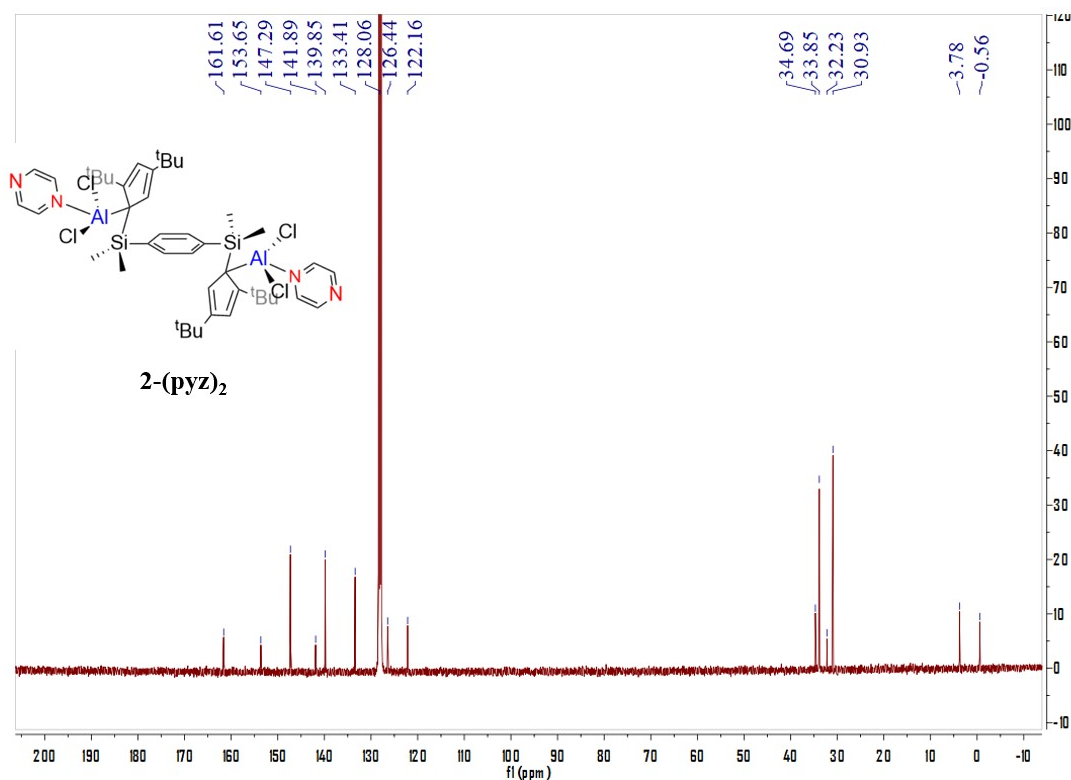

**Figure S14.** <sup>13</sup>C{<sup>1</sup>H} NMR spectrum of **2-(pyz)<sub>2</sub>** in benzene-d<sub>6</sub>.

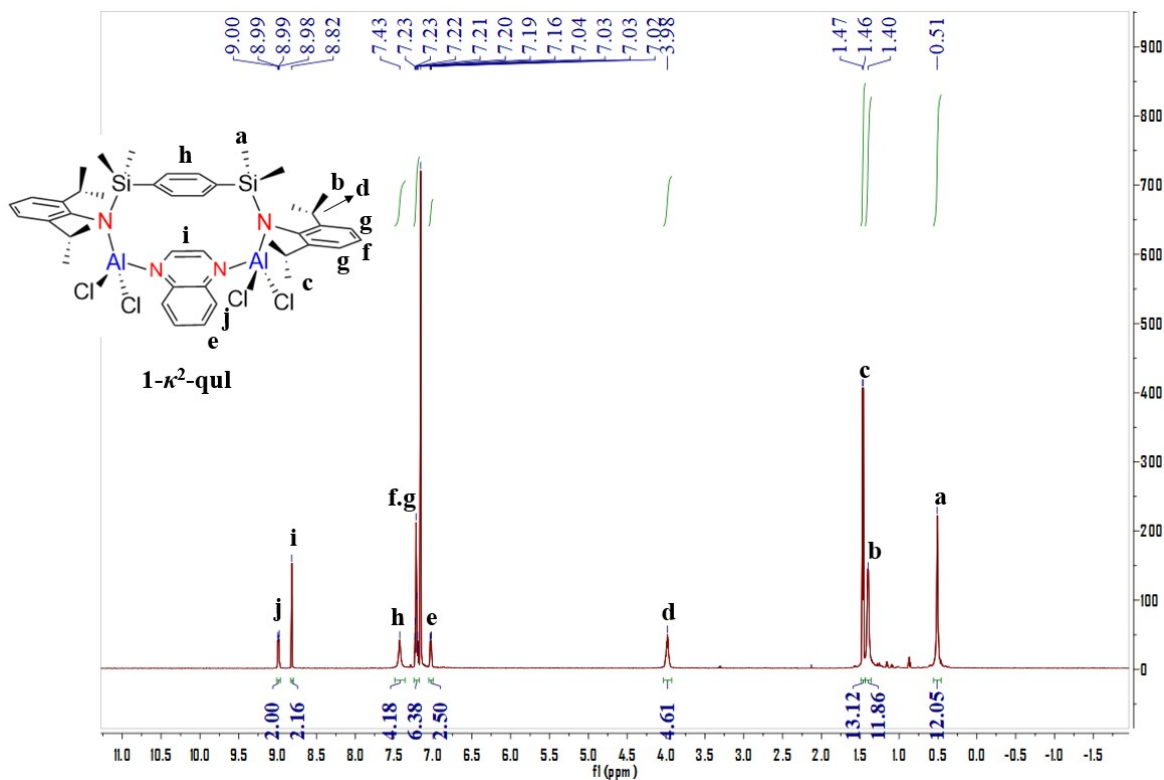

**Figure S15.**  $^1\text{H}$  NMR spectrum of **1- $\kappa^2$ -qul** in benzene- $d_6$ .

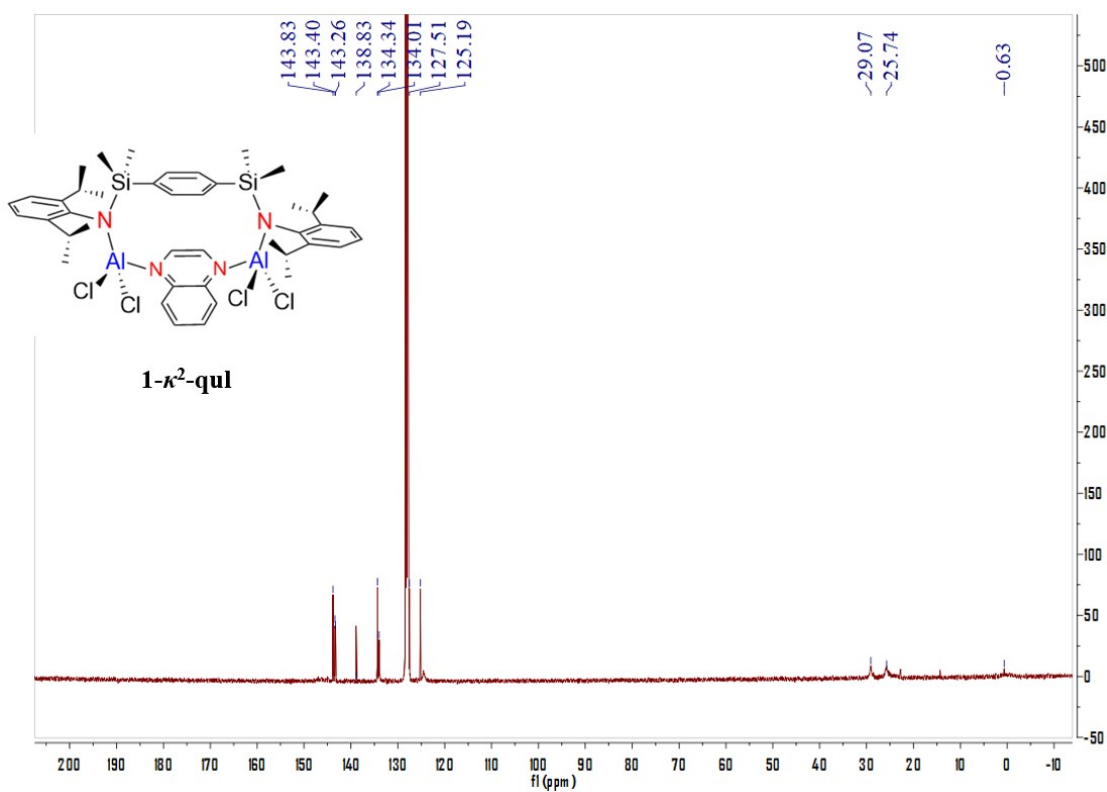

**Figure S16.**  $^{13}\text{C}\{^1\text{H}\}$  NMR spectrum of **1- $\kappa^2$ -qul** in benzene- $d_6$ .

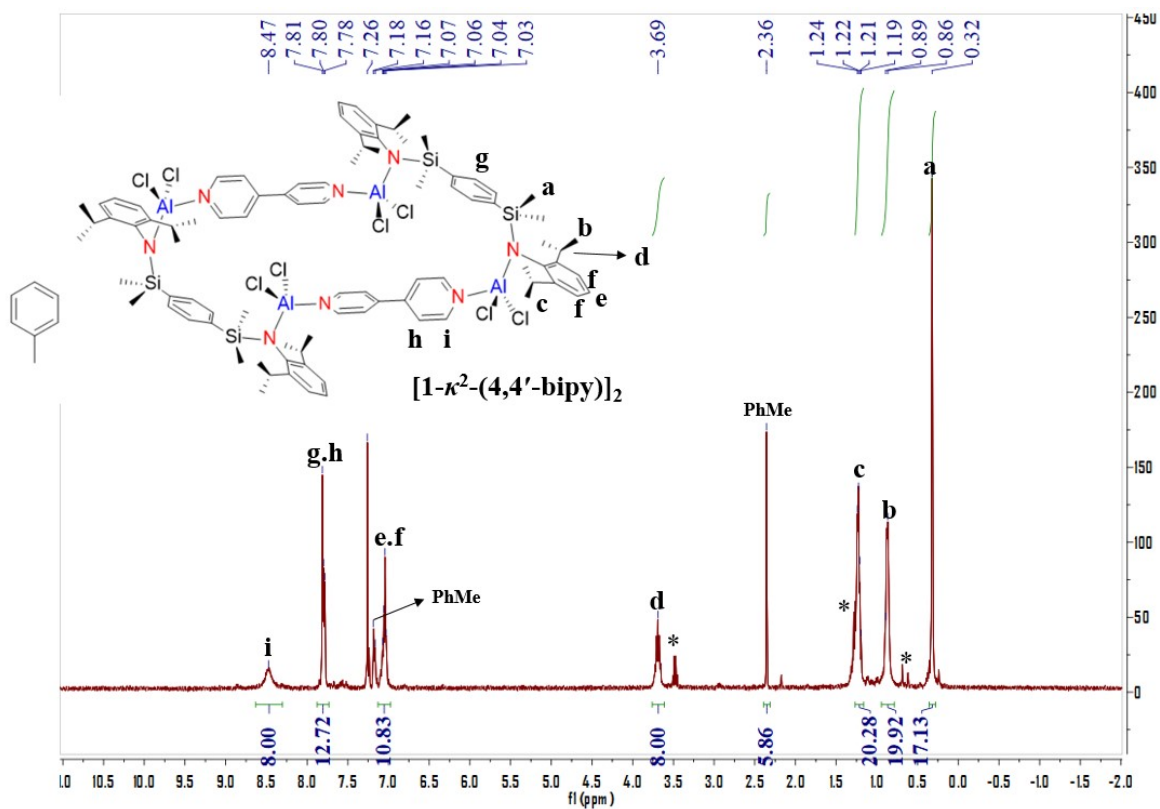

Figure S17.  $^1\text{H}$  NMR spectrum of  $1_2\text{-}\mu\text{-(bipy)}_2$  in  $\text{CDCl}_3$ .

## 2. Single-crystal X-ray diffraction crystal structure figures and data tables

Single-crystal X-ray diffraction for all complexes were performed on a Bruker APEX DUO diffractometer with APEX II 4K and multi-layer mirror monochromated Mo K $\alpha$  radiation ( $\lambda = 0.71073 \text{ \AA}$ ) at 200(2) K. Data collection and reduction were performed with Bruker APEX II software. All of non-hydrogen atoms are refined anisotropically. Hydrogen atoms attached to the carbons were fixed at calculated positions and refined using a riding mode. Multiple disordered solvent molecules were observed in the crystal structures of all complexes. Whenever possible, co-crystallizing solvent molecules were modeled. Otherwise, SQUEEZE was employed to treat diffuse solvent contribution in the voids. The structures were solved using direct methods, which yielded the positions of all non-hydrogen atoms. Hydrogen atoms on carbons were placed in calculated positions in the final structure refinement.

All cif files have been deposited on CCDC (2390325 (**1-(Et<sub>2</sub>O)**)<sub>2</sub>), 2390330 (**2-(Et<sub>2</sub>O)**)<sub>2</sub>), 2390331 (**1-(DMAP)**)<sub>2</sub>), 2390335 (**1- $\kappa^2$ -pyz**), 2390401 (**2- $\kappa^2$ -pyz**), 2390404 (**1-(pyz)**)<sub>2</sub>), 2390405 (**2-(pyz)**)<sub>2</sub>), 2390403 (**1- $\kappa^2$ -qul**), and 2390402 (**1<sub>2</sub>- $\mu$ -(bipy)**)<sub>2</sub>).

**Table S1.** Crystal data and structure refinement for **1-(Et<sub>2</sub>O)<sub>2</sub>**

|                                   |                                                                                                                |                  |
|-----------------------------------|----------------------------------------------------------------------------------------------------------------|------------------|
| Empirical formula                 | C <sub>84</sub> H <sub>140</sub> Al <sub>4</sub> Cl <sub>8</sub> N <sub>4</sub> O <sub>4</sub> Si <sub>4</sub> |                  |
| Formula weight                    | 1773.87                                                                                                        |                  |
| Temperature                       | 200(2) K                                                                                                       |                  |
| Wavelength                        | 0.71073 Å                                                                                                      |                  |
| Crystal system                    | Monoclinic                                                                                                     |                  |
| Space group                       | P 21/c                                                                                                         |                  |
| Unit cell dimensions              | a = 20.154(4) Å                                                                                                | a = 90°.         |
|                                   | b = 12.249(3) Å                                                                                                | b = 111.568(6)°. |
|                                   | c = 21.588(5) Å                                                                                                | g = 90°.         |
| Volume                            | 4956(2) Å <sup>3</sup>                                                                                         |                  |
| Z                                 | 2                                                                                                              |                  |
| Density (calculated)              | 1.189 Mg/m <sup>3</sup>                                                                                        |                  |
| Absorption coefficient            | 0.357 mm <sup>-1</sup>                                                                                         |                  |
| F(000)                            | 1896                                                                                                           |                  |
| Crystal size                      | 0.220 x 0.160 x 0.100 mm <sup>3</sup>                                                                          |                  |
| Theta range for data collection   | 2.173 to 25.141°.                                                                                              |                  |
| Index ranges                      | -23<=h<=23, -14<=k<=14, -25<=l<=25                                                                             |                  |
| Reflections collected             | 59068                                                                                                          |                  |
| Independent reflections           | 8764 [R(int) = 0.1485]                                                                                         |                  |
| Completeness to theta = 25.141°   | 98.8 %                                                                                                         |                  |
| Refinement method                 | Full-matrix least-squares on F <sup>2</sup>                                                                    |                  |
| Data / restraints / parameters    | 8764 / 0 / 464                                                                                                 |                  |
| Goodness-of-fit on F <sup>2</sup> | 1.026                                                                                                          |                  |
| Final R indices [I>2sigma(I)]     | R1 = 0.1230, wR2 = 0.3386                                                                                      |                  |
| R indices (all data)              | R1 = 0.2031, wR2 = 0.4032                                                                                      |                  |
| Extinction coefficient            | n/a                                                                                                            |                  |
| Largest diff. peak and hole       | 1.407 and -0.573 e.Å <sup>-3</sup>                                                                             |                  |

**Table S2.** Crystal data and structure refinement for **2-(Et<sub>2</sub>O)<sub>2</sub>**

|                                   |                                                                                                |                  |
|-----------------------------------|------------------------------------------------------------------------------------------------|------------------|
| Empirical formula                 | C <sub>44</sub> H <sub>76</sub> Al <sub>2</sub> Cl <sub>4</sub> O <sub>2</sub> Si <sub>2</sub> |                  |
| Formula weight                    | 888.99                                                                                         |                  |
| Temperature                       | 200(2) K                                                                                       |                  |
| Wavelength                        | 0.71073 Å                                                                                      |                  |
| Crystal system                    | Monoclinic                                                                                     |                  |
| Space group                       | C 2/c                                                                                          |                  |
| Unit cell dimensions              | a = 30.424(2) Å                                                                                | a = 90°.         |
|                                   | b = 13.1426(9) Å                                                                               | b = 107.722(2)°. |
|                                   | c = 13.4477(10) Å                                                                              | g = 90°.         |
| Volume                            | 5121.8(6) Å <sup>3</sup>                                                                       |                  |
| Z                                 | 4                                                                                              |                  |
| Density (calculated)              | 1.153 Mg/m <sup>3</sup>                                                                        |                  |
| Absorption coefficient            | 0.344 mm <sup>-1</sup>                                                                         |                  |
| F(000)                            | 1912                                                                                           |                  |
| Crystal size                      | 0.130 x 0.110 x 0.030 mm <sup>3</sup>                                                          |                  |
| Theta range for data collection   | 2.178 to 25.054°.                                                                              |                  |
| Index ranges                      | -36<=h<=36, -15<=k<=15, -16<=l<=16                                                             |                  |
| Reflections collected             | 38274                                                                                          |                  |
| Independent reflections           | 4518 [R(int) = 0.0920]                                                                         |                  |
| Completeness to theta = 25.054°   | 99.4 %                                                                                         |                  |
| Refinement method                 | Full-matrix least-squares on F <sup>2</sup>                                                    |                  |
| Data / restraints / parameters    | 4518 / 0 / 254                                                                                 |                  |
| Goodness-of-fit on F <sup>2</sup> | 1.085                                                                                          |                  |
| Final R indices [ >2sigma(I)]     | R1 = 0.0782, wR2 = 0.1807                                                                      |                  |
| R indices (all data)              | R1 = 0.1069, wR2 = 0.1967                                                                      |                  |
| Extinction coefficient            | n/a                                                                                            |                  |
| Largest diff. peak and hole       | 1.174 and -0.270 e.Å <sup>-3</sup>                                                             |                  |

**Table S3.** Crystal data and structure refinement for **1-(DMAP)<sub>2</sub>**

|                                   |                                                                                                |                |
|-----------------------------------|------------------------------------------------------------------------------------------------|----------------|
| Empirical formula                 | C <sub>48</sub> H <sub>70</sub> Al <sub>2</sub> Cl <sub>4</sub> N <sub>6</sub> Si <sub>2</sub> |                |
| Formula weight                    | 983.04                                                                                         |                |
| Temperature                       | 200(2) K                                                                                       |                |
| Wavelength                        | 0.71073 Å                                                                                      |                |
| Crystal system                    | Monoclinic                                                                                     |                |
| Space group                       | P 21/c                                                                                         |                |
| Unit cell dimensions              | a = 14.257(6) Å                                                                                | α = 90°.       |
|                                   | b = 8.838(4) Å                                                                                 | β = 90.02(1)°. |
|                                   | c = 21.438(9) Å                                                                                | γ = 90°.       |
| Volume                            | 2701.3(19) Å <sup>3</sup>                                                                      |                |
| Z                                 | 2                                                                                              |                |
| Density (calculated)              | 1.209 Mg/m <sup>3</sup>                                                                        |                |
| Absorption coefficient            | 0.333 mm <sup>-1</sup>                                                                         |                |
| F(000)                            | 1044                                                                                           |                |
| Crystal size                      | 0.110 x 0.050 x 0.040 mm <sup>3</sup>                                                          |                |
| Theta range for data collection   | 2.304 to 25.239°.                                                                              |                |
| Index ranges                      | -16 ≤ h ≤ 14, -10 ≤ k ≤ 9, -25 ≤ l ≤ 19                                                        |                |
| Reflections collected             | 9570                                                                                           |                |
| Independent reflections           | 4524 [R(int) = 0.1243]                                                                         |                |
| Completeness to theta = 25.239°   | 97.1 %                                                                                         |                |
| Refinement method                 | Full-matrix least-squares on F <sup>2</sup>                                                    |                |
| Data / restraints / parameters    | 4524 / 0 / 281                                                                                 |                |
| Goodness-of-fit on F <sup>2</sup> | 1.017                                                                                          |                |
| Final R indices [I > 2σ(I)]       | R1 = 0.0870, wR2 = 0.1791                                                                      |                |
| R indices (all data)              | R1 = 0.2157, wR2 = 0.2432                                                                      |                |
| Extinction coefficient            | n/a                                                                                            |                |
| Largest diff. peak and hole       | 0.537 and -0.560 e.Å <sup>-3</sup>                                                             |                |

**Table S4.** Crystal data and structure refinement for **1-κ<sup>2</sup>-pyz**

|                                   |                                                                                                |                  |
|-----------------------------------|------------------------------------------------------------------------------------------------|------------------|
| Identification code               | shelx                                                                                          |                  |
| Empirical formula                 | C <sub>38</sub> H <sub>54</sub> Al <sub>2</sub> Cl <sub>4</sub> N <sub>4</sub> Si <sub>2</sub> |                  |
| Formula weight                    | 818.79                                                                                         |                  |
| Temperature                       | 200(2) K                                                                                       |                  |
| Wavelength                        | 0.71073 Å                                                                                      |                  |
| Crystal system                    | Triclinic                                                                                      |                  |
| Space group                       | P -1                                                                                           |                  |
| Unit cell dimensions              | a = 11.1488(7) Å                                                                               | a = 104.981(2)°. |
|                                   | b = 13.9273(10) Å                                                                              | b = 90.704(2)°.  |
|                                   | c = 14.8262(11) Å                                                                              | g = 96.782(2)°.  |
| Volume                            | 2206.1(3) Å <sup>3</sup>                                                                       |                  |
| Z                                 | 2                                                                                              |                  |
| Density (calculated)              | 1.233 Mg/m <sup>3</sup>                                                                        |                  |
| Absorption coefficient            | 0.393 mm <sup>-1</sup>                                                                         |                  |
| F(000)                            | 864                                                                                            |                  |
| Crystal size                      | 0.200 x 0.160 x 0.070 mm <sup>3</sup>                                                          |                  |
| Theta range for data collection   | 2.239 to 25.017°.                                                                              |                  |
| Index ranges                      | -13<=h<=13, -16<=k<=16, -17<=l<=17                                                             |                  |
| Reflections collected             | 60691                                                                                          |                  |
| Independent reflections           | 7780 [R(int) = 0.0752]                                                                         |                  |
| Completeness to theta = 25.017°   | 99.9 %                                                                                         |                  |
| Refinement method                 | Full-matrix least-squares on F <sup>2</sup>                                                    |                  |
| Data / restraints / parameters    | 7780 / 0 / 451                                                                                 |                  |
| Goodness-of-fit on F <sup>2</sup> | 1.124                                                                                          |                  |
| Final R indices [ >2sigma(I)]     | R1 = 0.0403, wR2 = 0.0960                                                                      |                  |
| R indices (all data)              | R1 = 0.0695, wR2 = 0.1214                                                                      |                  |
| Extinction coefficient            | n/a                                                                                            |                  |
| Largest diff. peak and hole       | 0.379 and -0.417 e.Å <sup>-3</sup>                                                             |                  |



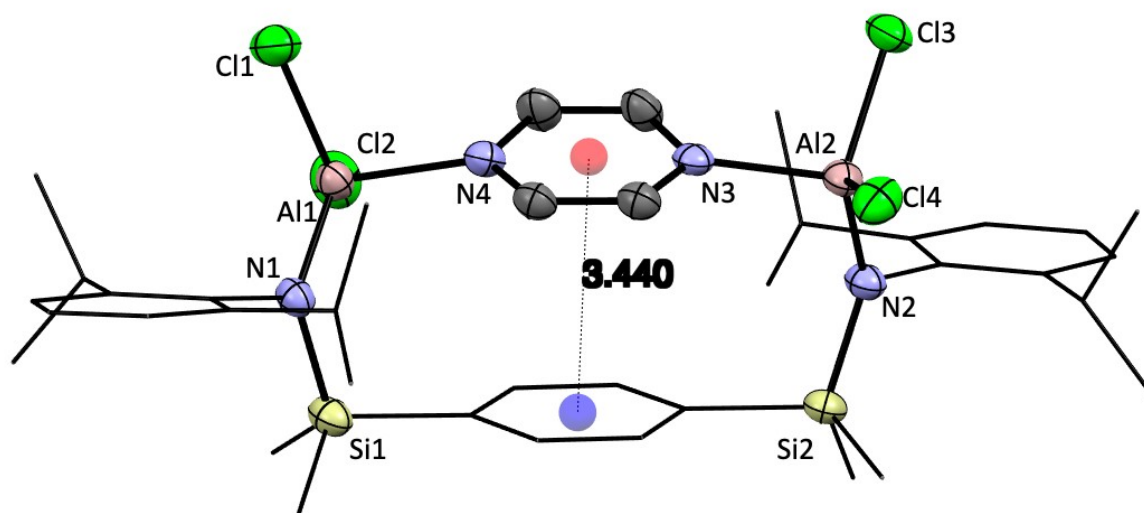

**Figure S18.** ORTEP of 1- $\kappa^2$ -pyz (50% thermal ellipsoids; all hydrogen atoms are omitted for clarity).

**Table S5.** Crystal data and structure refinement for **2-κ<sup>2</sup>-pyz**

|                                   |                                                                                                |                 |
|-----------------------------------|------------------------------------------------------------------------------------------------|-----------------|
| Identification code               | shelx                                                                                          |                 |
| Empirical formula                 | C <sub>40</sub> H <sub>60</sub> Al <sub>2</sub> Cl <sub>4</sub> N <sub>2</sub> Si <sub>2</sub> |                 |
| Formula weight                    | 820.84                                                                                         |                 |
| Temperature                       | 200(2) K                                                                                       |                 |
| Wavelength                        | 0.71073 Å                                                                                      |                 |
| Crystal system                    | Monoclinic                                                                                     |                 |
| Space group                       | P 21/n                                                                                         |                 |
| Unit cell dimensions              | a = 18.694(3) Å                                                                                | a = 90°.        |
|                                   | b = 11.3202(16) Å                                                                              | b = 91.315(4)°. |
|                                   | c = 21.709(3) Å                                                                                | g = 90°.        |
| Volume                            | 4592.8(11) Å <sup>3</sup>                                                                      |                 |
| Z                                 | 4                                                                                              |                 |
| Density (calculated)              | 1.187 Mg/m <sup>3</sup>                                                                        |                 |
| Absorption coefficient            | 0.377 mm <sup>-1</sup>                                                                         |                 |
| F(000)                            | 1744                                                                                           |                 |
| Crystal size                      | 0.170 x 0.110 x 0.070 mm <sup>3</sup>                                                          |                 |
| Theta range for data collection   | 2.179 to 25.048°.                                                                              |                 |
| Index ranges                      | -22<=h<=22, -13<=k<=13, -25<=l<=25                                                             |                 |
| Reflections collected             | 45645                                                                                          |                 |
| Independent reflections           | 8110 [R(int) = 0.0520]                                                                         |                 |
| Completeness to theta = 25.048°   | 99.8 %                                                                                         |                 |
| Refinement method                 | Full-matrix least-squares on F <sup>2</sup>                                                    |                 |
| Data / restraints / parameters    | 8110 / 0 / 467                                                                                 |                 |
| Goodness-of-fit on F <sup>2</sup> | 1.058                                                                                          |                 |
| Final R indices [I>2sigma(I)]     | R1 = 0.0461, wR2 = 0.1097                                                                      |                 |
| R indices (all data)              | R1 = 0.0741, wR2 = 0.1285                                                                      |                 |
| Extinction coefficient            | n/a                                                                                            |                 |
| Largest diff. peak and hole       | 0.351 and -0.293 e.Å <sup>-3</sup>                                                             |                 |

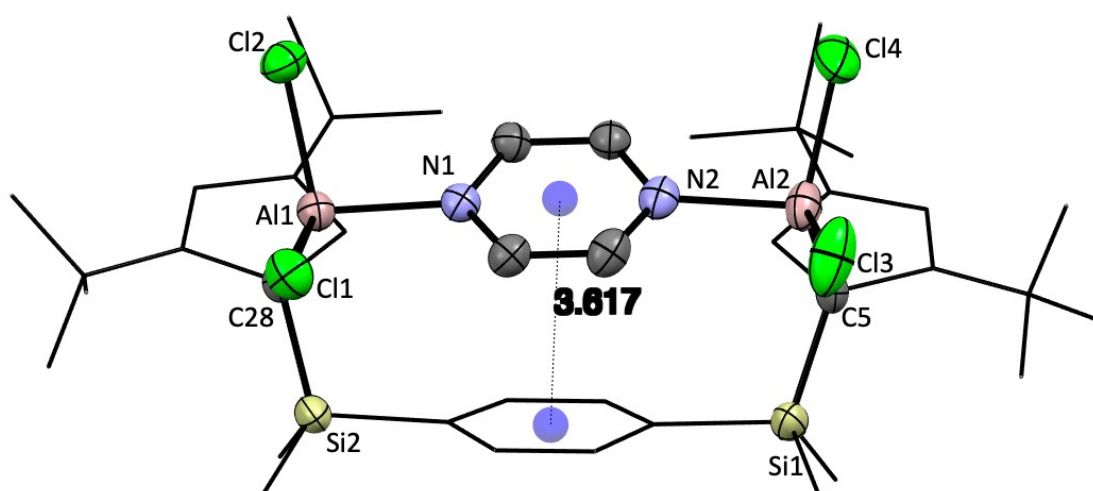

**Figure S19.** ORTEP of 2- $\kappa^2$ -pyz (50% thermal ellipsoids; all hydrogen atoms are omitted for clarity).

**Table S6.** Crystal data and structure refinement for **1-(pyz)<sub>2</sub>**

|                                   |                                                                                                |                  |
|-----------------------------------|------------------------------------------------------------------------------------------------|------------------|
| Empirical formula                 | C <sub>42</sub> H <sub>58</sub> Al <sub>2</sub> Cl <sub>4</sub> N <sub>6</sub> Si <sub>2</sub> |                  |
| Formula weight                    | 898.88                                                                                         |                  |
| Temperature                       | 200(2) K                                                                                       |                  |
| Wavelength                        | 0.71073 Å                                                                                      |                  |
| Crystal system                    | Monoclinic                                                                                     |                  |
| Space group                       | P 21/n                                                                                         |                  |
| Unit cell dimensions              | a = 9.898(3) Å                                                                                 | a = 90°.         |
|                                   | b = 14.727(4) Å                                                                                | b = 90.300(12)°. |
|                                   | c = 16.692(4) Å                                                                                | g = 90°.         |
| Volume                            | 2432.9(11) Å <sup>3</sup>                                                                      |                  |
| Z                                 | 2                                                                                              |                  |
| Density (calculated)              | 1.227 Mg/m <sup>3</sup>                                                                        |                  |
| Absorption coefficient            | 0.364 mm <sup>-1</sup>                                                                         |                  |
| F(000)                            | 948                                                                                            |                  |
| Crystal size                      | 0.230 x 0.080 x 0.040 mm <sup>3</sup>                                                          |                  |
| Theta range for data collection   | 2.398 to 25.029°.                                                                              |                  |
| Index ranges                      | -11<=h<=11, -17<=k<=16, -19<=l<=19                                                             |                  |
| Reflections collected             | 15600                                                                                          |                  |
| Independent reflections           | 4256 [R(int) = 0.0658]                                                                         |                  |
| Completeness to theta = 25.029°   | 99.1 %                                                                                         |                  |
| Refinement method                 | Full-matrix least-squares on F <sup>2</sup>                                                    |                  |
| Data / restraints / parameters    | 4256 / 0 / 253                                                                                 |                  |
| Goodness-of-fit on F <sup>2</sup> | 1.045                                                                                          |                  |
| Final R indices [I>2sigma(I)]     | R1 = 0.0438, wR2 = 0.0902                                                                      |                  |
| R indices (all data)              | R1 = 0.0782, wR2 = 0.1112                                                                      |                  |
| Extinction coefficient            | n/a                                                                                            |                  |
| Largest diff. peak and hole       | 0.276 and -0.321 e.Å <sup>-3</sup>                                                             |                  |

**Table S7.** Crystal data and structure refinement for **2-(pyz)<sub>2</sub>**

|                                   |                                                                                                |                 |
|-----------------------------------|------------------------------------------------------------------------------------------------|-----------------|
| Empirical formula                 | C <sub>44</sub> H <sub>64</sub> Al <sub>2</sub> Cl <sub>4</sub> N <sub>4</sub> Si <sub>2</sub> |                 |
| Formula weight                    | 900.93                                                                                         |                 |
| Temperature                       | 200(2) K                                                                                       |                 |
| Wavelength                        | 0.71073 Å                                                                                      |                 |
| Crystal system                    | Monoclinic                                                                                     |                 |
| Space group                       | C 2/c                                                                                          |                 |
| Unit cell dimensions              | a = 29.643(4) Å                                                                                | a = 90°.        |
|                                   | b = 11.0482(13) Å                                                                              | b = 94.938(4)°. |
|                                   | c = 15.368(2) Å                                                                                | g = 90°.        |
| Volume                            | 5014.3(12) Å <sup>3</sup>                                                                      |                 |
| Z                                 | 4                                                                                              |                 |
| Density (calculated)              | 1.193 Mg/m <sup>3</sup>                                                                        |                 |
| Absorption coefficient            | 0.352 mm <sup>-1</sup>                                                                         |                 |
| F(000)                            | 1912                                                                                           |                 |
| Crystal size                      | 0.470 x 0.030 x 0.020 mm <sup>3</sup>                                                          |                 |
| Theta range for data collection   | 2.342 to 25.039°.                                                                              |                 |
| Index ranges                      | -35 ≤ h ≤ 35, -13 ≤ k ≤ 12, -18 ≤ l ≤ 18                                                       |                 |
| Reflections collected             | 31182                                                                                          |                 |
| Independent reflections           | 4436 [R(int) = 0.1782]                                                                         |                 |
| Completeness to theta = 25.039°   | 99.9 %                                                                                         |                 |
| Refinement method                 | Full-matrix least-squares on F <sup>2</sup>                                                    |                 |
| Data / restraints / parameters    | 4436 / 0 / 261                                                                                 |                 |
| Goodness-of-fit on F <sup>2</sup> | 1.032                                                                                          |                 |
| Final R indices [I > 2σ(I)]       | R1 = 0.0748, wR2 = 0.1255                                                                      |                 |
| R indices (all data)              | R1 = 0.1456, wR2 = 0.1498                                                                      |                 |
| Extinction coefficient            | n/a                                                                                            |                 |
| Largest diff. peak and hole       | 0.296 and -0.369 e.Å <sup>-3</sup>                                                             |                 |

**Table S8.** Crystal data and structure refinement for **1-κ<sup>2</sup>-qul**

|                                   |                                                                                                |                 |
|-----------------------------------|------------------------------------------------------------------------------------------------|-----------------|
| Empirical formula                 | C <sub>42</sub> H <sub>56</sub> Al <sub>2</sub> Cl <sub>4</sub> N <sub>4</sub> Si <sub>2</sub> |                 |
| Formula weight                    | 868.84                                                                                         |                 |
| Temperature                       | 200(2) K                                                                                       |                 |
| Wavelength                        | 0.71073 Å                                                                                      |                 |
| Crystal system                    | Triclinic                                                                                      |                 |
| Space group                       | P 1                                                                                            |                 |
| Unit cell dimensions              | a = 8.9257(9) Å                                                                                | a = 83.306(3)°. |
|                                   | b = 10.0525(10) Å                                                                              | b = 79.441(3)°. |
|                                   | c = 13.5513(16) Å                                                                              | g = 80.105(3)°. |
| Volume                            | 1173.0(2) Å <sup>3</sup>                                                                       |                 |
| Z                                 | 1                                                                                              |                 |
| Density (calculated)              | 1.230 Mg/m <sup>3</sup>                                                                        |                 |
| Absorption coefficient            | 0.374 mm <sup>-1</sup>                                                                         |                 |
| F(000)                            | 458                                                                                            |                 |
| Crystal size                      | 0.200 x 0.140 x 0.020 mm <sup>3</sup>                                                          |                 |
| Theta range for data collection   | 2.349 to 25.080°.                                                                              |                 |
| Index ranges                      | -10<=h<=10, -11<=k<=11, -16<=l<=16                                                             |                 |
| Reflections collected             | 29810                                                                                          |                 |
| Independent reflections           | 8256 [R(int) = 0.0742]                                                                         |                 |
| Completeness to theta = 25.080°   | 99.9 %                                                                                         |                 |
| Refinement method                 | Full-matrix least-squares on F <sup>2</sup>                                                    |                 |
| Data / restraints / parameters    | 8256 / 3 / 501                                                                                 |                 |
| Goodness-of-fit on F <sup>2</sup> | 1.044                                                                                          |                 |
| Final R indices [I>2sigma(I)]     | R1 = 0.0920, wR2 = 0.2850                                                                      |                 |
| R indices (all data)              | R1 = 0.1080, wR2 = 0.2992                                                                      |                 |
| Absolute structure parameter      | 0.01(4)                                                                                        |                 |
| Extinction coefficient            | 0.025(10)                                                                                      |                 |
| Largest diff. peak and hole       | 1.247 and -0.529 e.Å <sup>-3</sup>                                                             |                 |

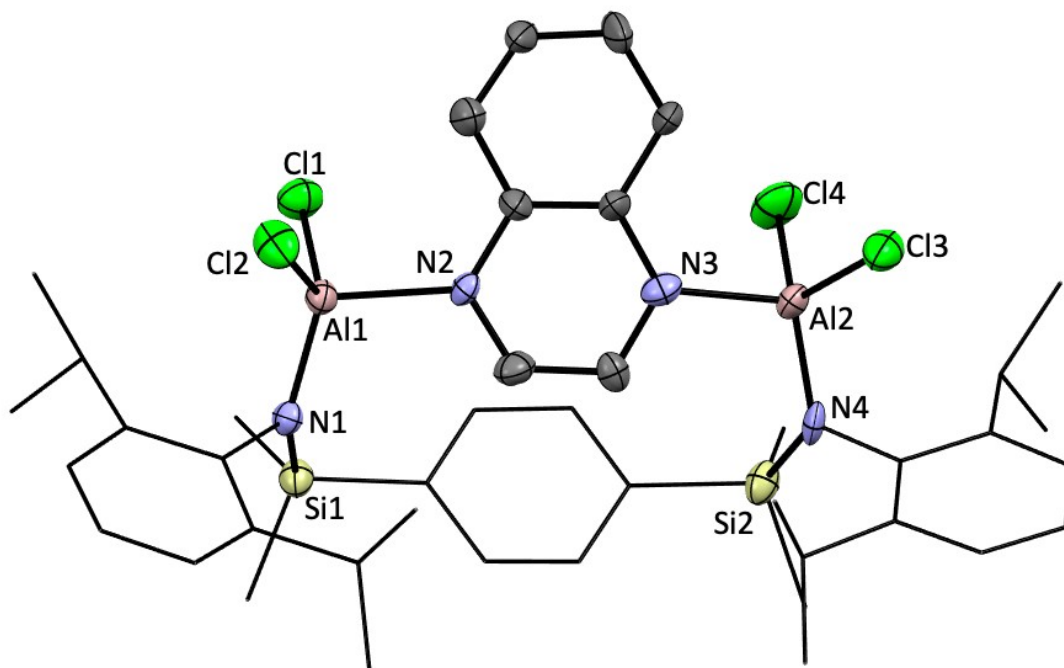

**Figure S19.** ORTEP of 1- $\kappa^2$ -quil (50% thermal ellipsoids; all hydrogen atoms are omitted for clarity).

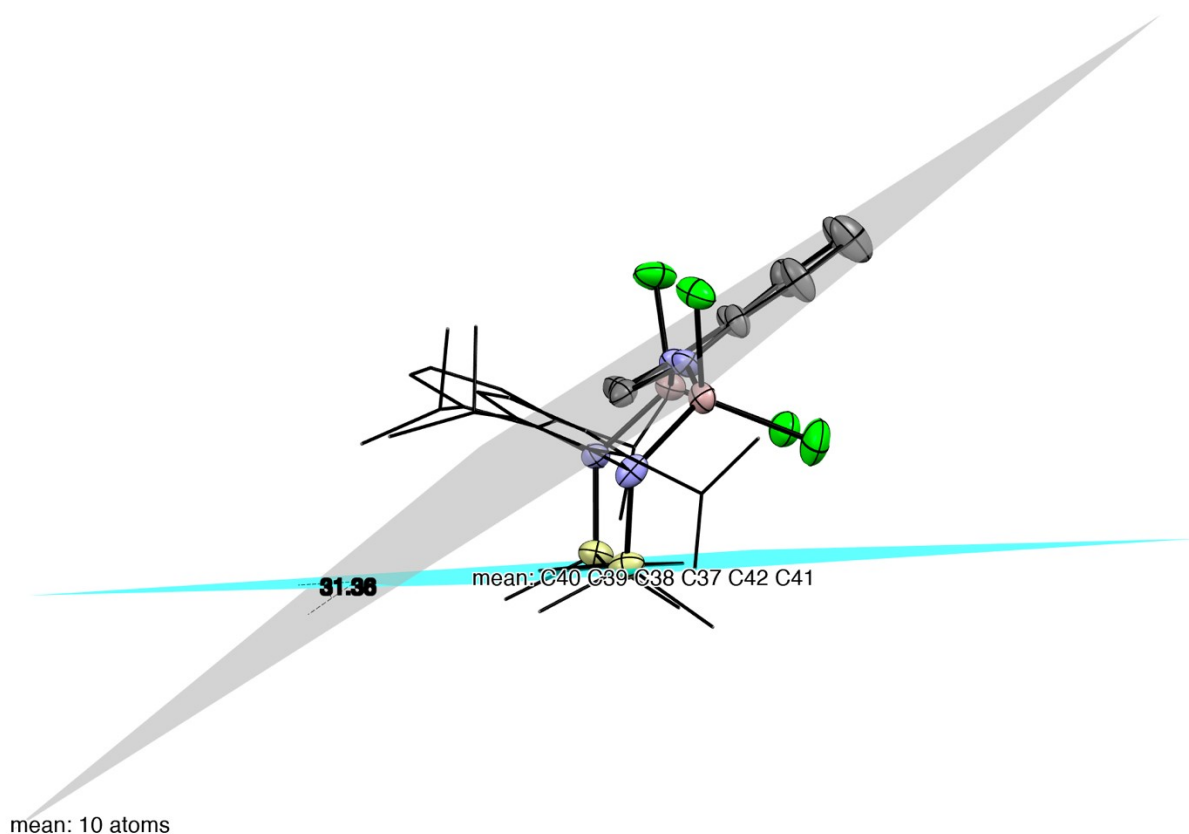

**Figure S20.** The side view of the molecular structure of 1- $\kappa^2$ -quil (50% thermal ellipsoids; all hydrogen atoms are omitted for clarity) showing the inclined quinoxaline plane (gray) relative to the central phenyl plane (cyan).

**Table S9.** Crystal data and structure refinement for **1<sub>2</sub>-μ-(bipy)<sub>2</sub>**

|                                   |                                                                                                 |                 |
|-----------------------------------|-------------------------------------------------------------------------------------------------|-----------------|
| Empirical formula                 | C <sub>95</sub> H <sub>124</sub> Al <sub>4</sub> Cl <sub>8</sub> N <sub>8</sub> Si <sub>4</sub> |                 |
| Formula weight                    | 1881.89                                                                                         |                 |
| Temperature                       | 200(2) K                                                                                        |                 |
| Wavelength                        | 0.71073 Å                                                                                       |                 |
| Crystal system                    | Monoclinic                                                                                      |                 |
| Space group                       | P 21/n                                                                                          |                 |
| Unit cell dimensions              | a = 18.184(2) Å                                                                                 | a = 90°.        |
|                                   | b = 10.2631(12) Å                                                                               | b = 94.243(3)°. |
|                                   | c = 27.735(3) Å                                                                                 | g = 90°.        |
| Volume                            | 5161.9(10) Å <sup>3</sup>                                                                       |                 |
| Z                                 | 2                                                                                               |                 |
| Density (calculated)              | 1.211 Mg/m <sup>3</sup>                                                                         |                 |
| Absorption coefficient            | 0.345 mm <sup>-1</sup>                                                                          |                 |
| F(000)                            | 1988                                                                                            |                 |
| Crystal size                      | 0.310 x 0.090 x 0.020 mm <sup>3</sup>                                                           |                 |
| Theta range for data collection   | 2.280 to 25.112°.                                                                               |                 |
| Index ranges                      | -21<=h<=20, -12<=k<=12, -33<=l<=33                                                              |                 |
| Reflections collected             | 70763                                                                                           |                 |
| Independent reflections           | 9167 [R(int) = 0.1097]                                                                          |                 |
| Completeness to theta = 25.112°   | 99.6 %                                                                                          |                 |
| Refinement method                 | Full-matrix least-squares on F <sup>2</sup>                                                     |                 |
| Data / restraints / parameters    | 9167 / 0 / 554                                                                                  |                 |
| Goodness-of-fit on F <sup>2</sup> | 1.050                                                                                           |                 |
| Final R indices [I>2sigma(I)]     | R1 = 0.0575, wR2 = 0.1182                                                                       |                 |
| R indices (all data)              | R1 = 0.1250, wR2 = 0.1499                                                                       |                 |
| Extinction coefficient            | n/a                                                                                             |                 |
| Largest diff. peak and hole       | 0.386 and -0.465 e.Å <sup>-3</sup>                                                              |                 |



### 3. Computational details and results

Density Functional Theory (DFT) calculations were carried out using the Gaussian 16 suite of programs.<sup>1</sup> Geometry optimizations were conducted at the M06-2X<sup>2-3</sup>/def2-SVP<sup>4</sup> level of theory, incorporating Grimme's D3 dispersion correction with Becke-Johnson (BJ) damping.<sup>5-6</sup>

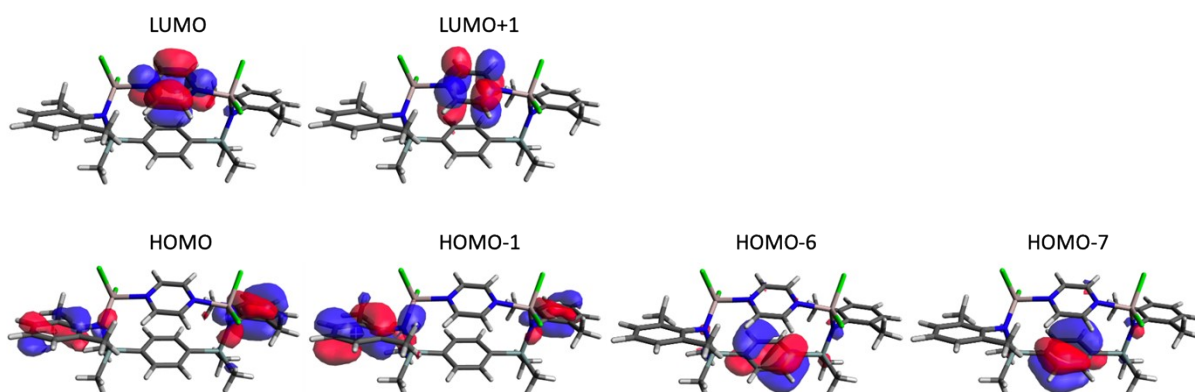

**Figure S21.** Frontier orbitals of 1- $\kappa^2$ -pyz.

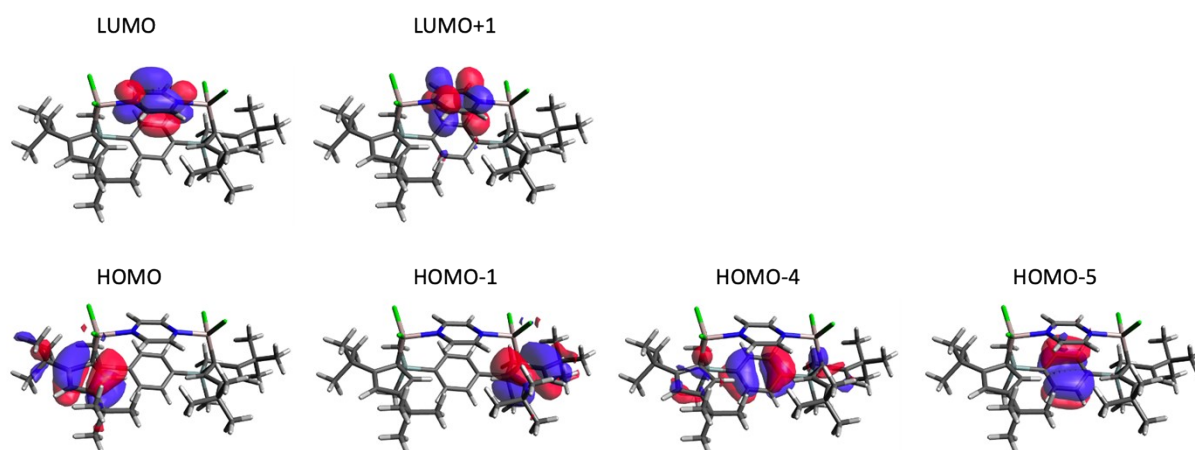

**Figure S22.** Frontier orbitals of 2- $\kappa^2$ -pyz.

## 4. References

1. Frisch, M. J.; Trucks, G. W.; Schlegel, H. B.; Scuseria, G. E.; Robb, M. A.; Cheeseman, J. R.; Scalmani, G.; Barone, V.; Petersson, G. A.; Nakatsuji, H.; Li, X.; Caricato, M.; Marenich, A. V.; Bloino, J.; Janesko, B. G.; Gomperts, R.; Mennucci, B.; Hratchian, H. P.; Ortiz, J. V.; Izmaylov, A. F.; Sonnenberg, J. L.; Williams, Ding, F.; Lipparini, F.; Egidi, F.; Goings, J.; Peng, B.; Petrone, A.; Henderson, T.; Ranasinghe, D.; Zakrzewski, V. G.; Gao, J.; Rega, N.; Zheng, G.; Liang, W.; Hada, M.; Ehara, M.; Toyota, K.; Fukuda, R.; Hasegawa, J.; Ishida, M.; Nakajima, T.; Honda, Y.; Kitao, O.; Nakai, H.; Vreven, T.; Throssell, K.; Montgomery Jr., J. A.; Peralta, J. E.; Ogliaro, F.; Bearpark, M. J.; Heyd, J. J.; Brothers, E. N.; Kudin, K. N.; Staroverov, V. N.; Keith, T. A.; Kobayashi, R.; Normand, J.; Raghavachari, K.; Rendell, A. P.; Burant, J. C.; Iyengar, S. S.; Tomasi, J.; Cossi, M.; Millam, J. M.; Klene, M.; Adamo, C.; Cammi, R.; Ochterski, J. W.; Martin, R. L.; Morokuma, K.; Farkas, O.; Foresman, J. B.; Fox, D. J. *Gaussian 16 Rev. C.01*, Wallingford, CT, 2016.
2. Zhao, Y.; Truhlar, D. G., A new local density functional for main-group thermochemistry, transition metal bonding, thermochemical kinetics, and noncovalent interactions. *J. Chem. Phys.* **2006**, *125* (19), 194101.
3. Zhao, Y.; Truhlar, D. G., The M06 suite of density functionals for main group thermochemistry, thermochemical kinetics, noncovalent interactions, excited states, and transition elements: two new functionals and systematic testing of four M06-class functionals and 12 other functionals. *Theor. Chem. Acc.* **2008**, *120* (1), 215-241.
4. Weigend, F.; Ahlrichs, R., Balanced basis sets of split valence, triple zeta valence and quadruple zeta valence quality for H to Rn: Design and assessment of accuracy. *Phys. Chem. Chem. Phys.* **2005**, *7* (18), 3297-3305.
5. Grimme, S.; Antony, J.; Ehrlich, S.; Krieg, H., A consistent and accurate ab initio parametrization of density functional dispersion correction (DFT-D) for the 94 elements H-Pu. *J. Chem. Phys.* **2010**, *132* (15), 154104.
6. Grimme, S.; Ehrlich, S.; Goerigk, L., Effect of the damping function in dispersion corrected density functional theory. *J. Comput. Chem.* **2011**, *32* (7), 1456-1465.
